# Supplementary material for: Parylene to silicon nitride bonding for post-integration of high pressure microfluidics to CMOS devices
Source: Royal Society of Chemistry journal article supplement (doi:10.1039/c1lc20727j), 2011-12-02
Supplement: c1lc20727j.pdf [file c1lc20727j.pdf]

Supplementary Information (SI)

Parylene to silicon-nitride bonding for post-integration of high pressure microfluidics to CMOS devices

Ata Tuna Ciftlik and Martin A.M. Gijs

|                                        |                                                                                                                             |
|----------------------------------------|-----------------------------------------------------------------------------------------------------------------------------|
| Supplementary Figure 1<br>(SI Fig. S1) | Bright field, SEM and fluorescent images of a microfluidic device sample                                                    |
| Supplementary Figure 2<br>(SI Fig. S2) | Histogram of the DC resistance of the pad-to-pad test electrodes.                                                           |
| Supplementary Figure 3<br>(SI Fig. S3) | Bright field image of a fractured interface                                                                                 |
| Supplementary Figure 4<br>(SI Fig. S4) | Photograph of a 4-inch bonded wafer with microfluidic structures                                                            |
| Supplementary Table 1<br>(SI Table T1) | Comparison of bonding process parameters with respect to previously reported double layer Parylene-C to Parylene-C bonding. |

## Supplementary Figures

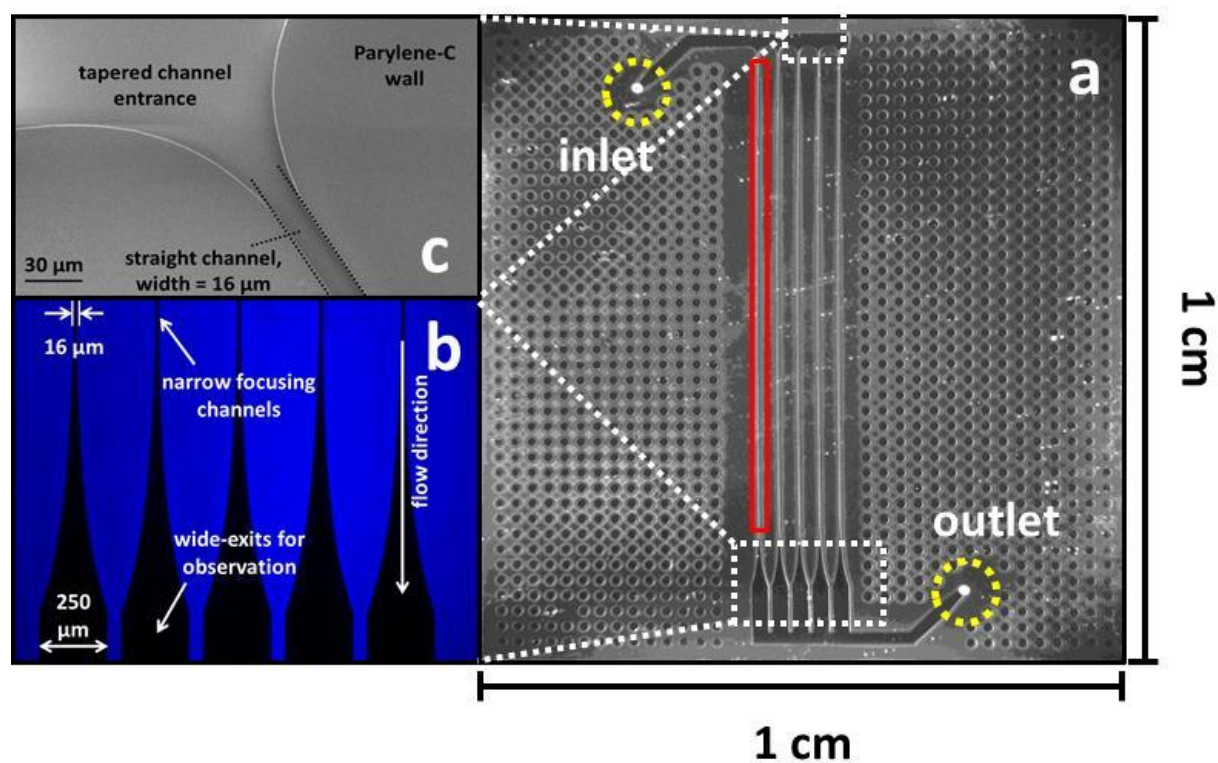

**Fig. S1** Pictures of microfluidic devices (a) Bright field stereo-microscope image of the whole chip, indicating the functional parts. (b) Fluorescent image of the chip exit with corresponding dimensions (5x objective, UV excitation/Blue emission filter). (c) SEM image of the channel entrance region and a part of the straight channel, taken before bonding. In our case, the height of the channels is determined by the coated parylene-C thickness, which is chosen to be 10  $\mu\text{m}$ .

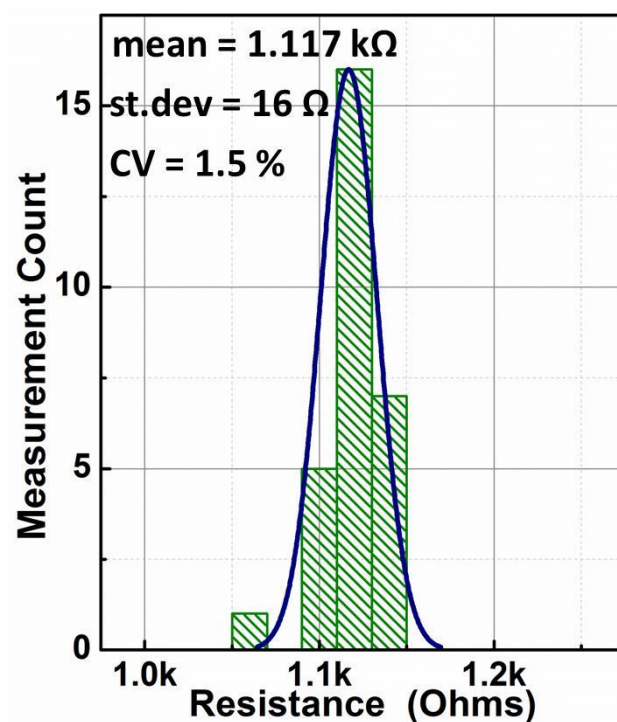

**Fig. S2** Histogram of the DC resistance of the pad-to-pad test electrodes. The measurements were done with a DC multimeter after bonding and dicing of the device. These structures consist of 100 nm thick and 20  $\mu\text{m}$  wide platinum electrodes having approximately 1.5 mm length and connected to a PCB via zebra connectors, as suggested by Fig. 2(c). The picture of the devices with electrodes used for these experiments is shown in Fig. 2(b).

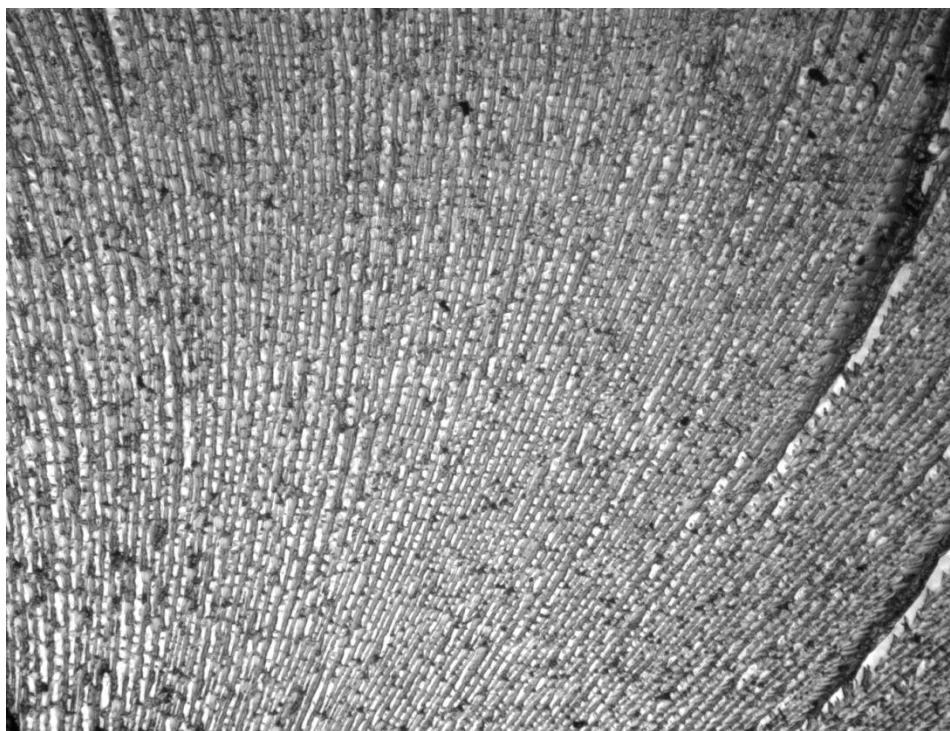

**Fig. S3** Bright field image of a fractured interface taken with a 5X objective, showing the cracks that occurred in the bulk of the Parylene-C during the pull-tests.

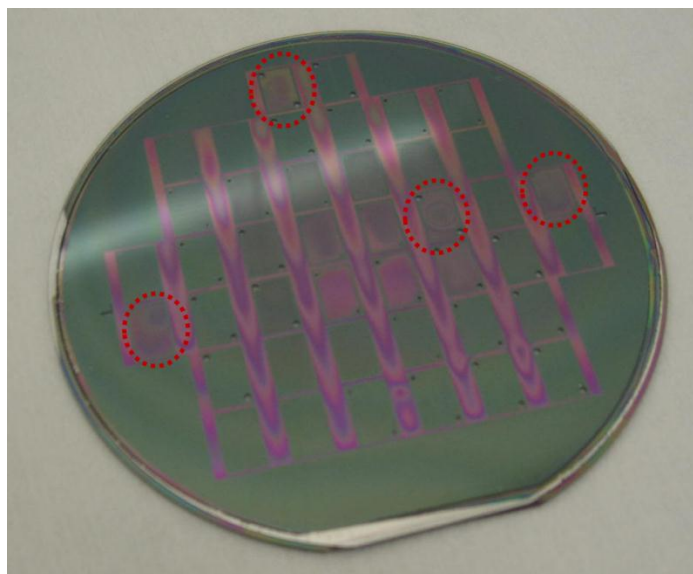

**Fig. S4** Photograph of a 4-inch wafer bonded wafer. This design contains 42 microfluidic devices. Here, the regions with bonded Parylene-C appear green and the regions where the Parylene layer has been etched before bonding appear purple. The devices look different due to different designs containing varying percentages of etched structures. Also, inlet sizes range between 100  $\mu\text{m}$  and 1000  $\mu\text{m}$ . In this wafer, the red dotted circles show 4 devices that are not properly bonded, and the corresponding bonded device yield is 90%.

**Table S1** - Comparison of bonding process parameters with respect to previously reported double layer Parylene-to-Parylene bonding.

| Ref                  | Temp.              | Duration | Tool Pressure | Bonding Env. | Bonding Equipment     | Method                                     | Comments                         |
|----------------------|--------------------|----------|---------------|--------------|-----------------------|--------------------------------------------|----------------------------------|
| Kim et. al. [9]      | 230 °C             | 30 min   | 100 kPa       | Vacuum       | Commercial            | Parylene-to-Parylene                       | Convection heating, 4-inch wafer |
| Noh et.al. [8]       | 160 °C (interface) | 30 min   | 1.5 MPa       | Air          | Custom Made           | Parylene-to-Parylene                       | Microwave Heating, 3-inch wafer  |
| Ziegler et. al. [19] | 160 °C             | 30 min   | 4.9 MPa       | Air          | Custom Made           | Parylene-to-Parylene and delamination      | Convection heating, 2-inch wafer |
| <i>This Work</i>     | 280 °C             | 40min    | 100 kPa       | Vacuum       | Commercial (Suss SB6) | Parylene-to-Si <sub>3</sub> N <sub>4</sub> | Convection heating, 4-inch wafer |
